# Supplementary material
Source: Research Square preprint supplement (doi:10.21203/rs.3.rs-9314471/v1)
Supplement: Supplementary file 1 [file e21ea1b408b1ddb860be7698.docx]

**Implications of bio-preservation using *Pediococcus pentosaceus* HPM1-derived bacteriocin for the shelf-life enhancement of food**

**Current Microbiology**

**Authors:**

Payel Sur1, Harekrishna Jana1*, Mrinal Kanti Paira2, Puspendu Shit3, Samiran Sona Gauri4

**Affiliations:**

1 Department of Microbiology, Raja Narendralal Khan Women’s College (Autonomous), Paschim Medinipur-721102, West Bengal, India.

2 Department of Chemistry, Raja Narendralal Khan Women’s College (Autonomous), Paschim Medinipur-721102, West Bengal, India.

3 Department of Zoology, Debra Thana Sahid Kshudiram Smriti Mahavidyalaya (Autonomous), Paschim Medinipur-721126, West Bengal, India

4Central Research Facility, Indian Institute of Technology, Kharagpur, West Bengal-721302, India

***Corresponding Author:** Dr. Harekrishna Jana

Email: [hkjmicro@gmail.com](mailto:hkjmicro@gmail.com)

**Supplementary Materials**

**Table S1** Determination of antibacterial activity of isolate HPM1 against food spoilage bacteria. Data are presented as mean ± standard deviation (n=3).

| **Strain** | **Zone of inhibition (mm) Mean± SD** | | | | | | | |
| --- | --- | --- | --- | --- | --- | --- | --- | --- |
| *Bacillus cereus* | *Staphylococcus aureus* | *Clostridium botulinum* | *Enterococcus faecalis.* | *Escherichia coli* | *Pseudomonas aeruginosa* | *Vibrio cholerae* | *Klebsiella pneumoniae.* |
| Control | 8±0 | 8±0 | 8±0 | 8±0 | 8±0 | 8±0 | 8±0 | 8±0 |
| HPM1 | 17.67±.577 | 16.67±0.577 | 20.33±0.577 | 18.33±0.577 | 17±1 | 21±1 | 18.67±1.157 | 19.33±1.527 |

**Table S2** Determination of antifungal activity of isolate HPM1 against food spoilage fungus. Data are presented as mean ± standard deviation (n=3).

| **Strain** | **Zone of inhibition (mm) Mean± SD** | | | |
| --- | --- | --- | --- | --- |
| *Aspergillus niger* | *Aspergillus flavus* | *Aspergillus fumigatus* | *Candida albicans* |
| Control | 8±0 | 8±0 | 8±0 | 8±0 |
| HPM1 | 15±1 | 12±1 | 10.33±1.154 | 18±1 |

**Table S3** Confirmation of bacteriocin production activity of isolate HPM1 compared with the positive control strain. Data are presented as mean ± standard deviation (n=3). Statistical significance was determined using One-way ANOVA followed by Tukey’s HSD test.

| **Strain** | **Zone of inhibition (mm) Mean± SD** | | | | | | | |  |
| --- | --- | --- | --- | --- | --- | --- | --- | --- | --- |
| *Bacillus cereus* | *Staphylococcus aureus* | *Clostridium botulinum* | *Enterococcus faecalis.* | *Escherichia coli* | *Pseudomonas aeruginosa* | *Vibrio cholerae* | *Klebsiella pneumoniae.* | *Listeria monocytogenus* |
| Control | 8±0 | 8±0 | 8±0 | 8±0 | 8±0 | 8±0 | 8±0 | 8±0 | 8±0 |
| Possitive control | 19.67±0.577 | 17±1 | 16.33±0.577 | 23.67±0.577 | 20.67±0.577 | 24.33±0.577 | 18±1 | 21±1 | 19.67±1.154 |
| HPM1 | 18.0±1 | 17±1 | 19.67±0.577 | 18.33±0.577 | 16.33±0.577 | 21.66±0.577 | 17.67±1.155 | 20.0±1 | 17±1 |

**Table S4** Confirmation of bacteriocin production activity of isolate HPM1 using proteolytic enzymes with the positive control. Data are presented as mean ± standard deviation (n=3). Statistical significance was determined using One-way ANOVA followed by Tukey’s HSD test.

| **Strain** | **Zone of inhibition (mm) Mean± SD** | | | | | | | |  |
| --- | --- | --- | --- | --- | --- | --- | --- | --- | --- |
| *Bacillus cereus* | *Staphylococcus aureus* | *Clostridium botulinum* | *Enterococcus faecalis.* | *Escherichia coli* | *Pseudomonas aeruginosa* | *Vibrio cholerae* | *Klebsiella pneumoniae.* | *Listeria monocytogenus* |
| control | 8±0 | 8±0 | 8±0 | 8±0 | 8±0 | 8±0 | 8±0 | 8±0 | 8±0 |
| Possitive control | 19±1 | 17±1 | 16.33±0.577 | 23±1 | 20±1 | 24.33±0.577 | 18.33±0.577 | 21±1 | 19.67±1.155 |
| Possitive control+proteinase K | 8±0 | 8±0 | 8±0 | 8±0 | 8±0 | 8±0 | 8±0 | 8±0 | 8±0 |
| HPM1 | 18.0±1 | 17±1 | 19.67±0.577 | 18.33±0.577 | 16.33±0.577 | 21.66±0.577 | 17.67±1.155 | 20.0±1 | 17±1 |
| HPM1+Proteinase K | 8±0 | 8±0 | 8±0 | 8±0 | 8±0 | 8±0 | 8±0 | 8±0 | 8±0 |

**Table S5** Phenotypic and biochemical characterisation of isolate HPM1

| **Phenotypic and biochemical characteristics of HPM1** | | |
| --- | --- | --- |
| **Phenotypic characteristics** | | |
| Shape | | Rod |
| Gram Staining | | Positive |
| Endospore staining | | Positive |
| Motility | | Immotile |
| **Biochemical characteristics** | | |
| Catalase test | | Negative |
| Methyl red test | | Negative |
| Indole test | | Negative |
| Urease test | | Negative |
| Nitrate reduction test | | Negative |
| Citate utilization test | | Negative |
| Carbohydrate fermentation test | Lactose | Negative |
| Glucose | Positive |
| Sucrose | Positive |
| H2S production test | | Negative |

**Table S6** Determination of Growth kinetics of *P. pentosaceus* HPM1 at various temperatures. Optical density (OD) at 560 nm was measured at 12-hour intervals up to 72 hours. Data are presented as mean ± standard deviation (n=3).

| **Time** | **Optical density (OD) at 560 nm** | | | | | | | |
| --- | --- | --- | --- | --- | --- | --- | --- | --- |
| 4° C | 20°C | 25°C | 30°C | 35°C | 40°C | 45°C | 50°C |
| 0 h | 0.02±0 | 0.02±0.00 | 0.02±0.00 | 0.02±0.00 | 0.02±0.00 | 0.02±0 | 0.02±0 | 0.02±0 |
| 12h | 0.02±0 | 0.05±0.01 | 0.06±0.01 | 0.09±0.02 | 0.21±0.01 | 0.20±0.01 | 0.05±0.01 | 0.02±0 |
| 24h | 0.02±0 | 0.10±0.01 | 0.13±0.01 | 0.19±0.05 | 0.35±0.01 | 0.40±0.01 | 0.09±0.02 | 0.02±0 |
| 36h | 0.02±0 | 0.12±0.01 | 0.18±0.01 | 0.57±0.03 | 0.67±0.01 | 0.69±0.01 | 0.11±0.01 | 0.02±0 |
| 48h | 0.02±0 | 0.15±0.01 | 0.15±0.01 | 0.61±0.03 | 0.78±0.01 | 0.77±0.01 | 0.13±0.01 | 0.02±0 |
| 60h | 0.02±0 | 0.13±0.01 | 0.13±0.01 | 0.51±0.01 | 0.7±0.01 | 0.70±0.01 | 0.09±0.02 | 0.02±0 |
| 72h | 0.02±0 | 0.12±0.01 | 0.11±0.02 | 0.45±0.05 | 0.64±0.02 | 0.61±0.01 | 0.07±0.01 | 0.02±0 |

**Table S7** Determination of Growth Kinetics of *P. pentosaceus* HPM1 at various pH. Optical density (OD) at 560 nm was measured at 12-hour intervals up to 72 hours. Data are presented as mean ± standard deviation (n=3).

| **Time** | **Optical density (OD) at 560 nm** | | | | | | |
| --- | --- | --- | --- | --- | --- | --- | --- |
| pH3 | pH5 | pH6 | pH6.5 | pH7 | pH8 | pH9 |
| 0h | 0.02±0 | 0.02±0 | 0.02±0 | 0.02±0 | 0.02±0 | 0.02±0 | 0.02±0 |
| 12h | 0.04±0 | 0.17±0.02 | 0.23±0.01 | 0.23±0.01 | 0.22±0.01 | 0.04±0 | 0.02±0 |
| 24h | 0.04±0 | 0.37±0.01 | 0.40±0.01 | 0.46±0.02 | 0.46±0.02 | 0.04±0 | 0.02±0 |
| 36h | 0.04±0 | 0.44±0.01 | 0.49±0.04 | 0.62±0.03 | 0.63±0.04 | 0.04±0 | 0.02±0 |
| 48h | 0.02±0 | 0.52±0.01 | 0.62±0.02 | 0.79±0.01 | 0.78±0.01 | 0.02±0 | 0.02±0 |
| 60h | 0.04±0 | 0.47±0.04 | 0.55±0.01 | 0.73±0.02 | 0.70±0.02 | 0.04±0 | 0.02±0 |
| 72h | 0.04±0 | 0.45±0.04 | 0.51±0.02 | 0.57±0.03 | 0.54±0.02 | 0.04±0 | 0.02±0 |

**Table S8** Effect of P. pentosaceus HPM1 bacteriocin on vegetables weight during preservation. Data are presented as mean ± standard deviation (n=3). Statistical significance was determined using One-way ANOVA followed by Tukey’s HSD test.

| **Vegetable** | **Weight (gm)** | | |
| --- | --- | --- | --- |
| Fresh | Control_treatment | HPM1_ treatment |
| Tomato | 39.67±1.527 | 32.33±2.516 | 39.00±1 |
| Cucumber | 70.00±2 | 46.67±2.516 | 67.33±1.527 |
| Better gourd | 25.00±2 | 19.67±1.527 | 23.83±1.040 |
| Pointed gourd | 20.00±2 | 14.67±0.577 | 19.83±2.020 |

**Table S9** Effect of P. pentosaceus HPM1 bacteriocin on vegetables pH value during preservation. Data are presented as mean ± standard deviation (n=3). Statistical significance was determined using One-way ANOVA followed by Tukey’s HSD test.

| **Vegetable** | **pH** | | |
| --- | --- | --- | --- |
| Fresh | Control_treatment | HPM1_ treatment |
| Tomato | 5.56±0.115 | 7.56±0.208 | 5.56±0.208 |
| Cucumber | 5.67±0.153 | 4.00±0.2 | 5.60±0.100 |
| Better gourd | 5.00±0.1 | 5.70±0.2 | 5.06±0.115 |
| Pointed gourd | 6.27±0.152 | 5.30±0.1 | 6.13±0.115 |

.

**Table S10** Effect of P. pentosaceus HPM1 bacteriocin on vegetables carbohydrate concentration during preservation. Data are presented as mean ± standard deviation (n=3). Statistical significance was determined using One-way ANOVA followed by Tukey’s HSD test.

| **Vegetable** | **Carbohydrate concentration (µg/ml)** | | |
| --- | --- | --- | --- |
| Fresh | Control_treatment | HPM1_ treatment |
| Tomato | 185.35±1.782 | 42.54±1.799 | 181.18±1.824 |
| Cucumber | 148.64±0.116 | 55.25±0.11 | 146.91±1.642 |
| Better gourd | 194.09±0.011 | 91.12±1.636 | 193.15±1.633 |
| Pointed gourd | 191.26±0 | 66.56±0.005 | 189.37±1.633 |

**Table S11** Effect of P. pentosaceus HPM1 bacteriocin on vegetables protein concentration during preservation. Data are presented as mean ± standard deviation (n=3). Statistical significance was determined using One-way ANOVA followed by Tukey’s HSD test.

| **Vegetable** | **Protein concentration (µg/ml)** | | |
| --- | --- | --- | --- |
| Fresh | Control_treatment | HPM1_ treatment |
| Tomato | 270.99±2.827 | 148.28±3.539 | 269.80±6.174 |
| Cucumber | 202.61±0.584 | 97.15±0.285 | 192.28 ±9.415 |
| Better gourd | 389.60±0.03 | 223.03±0.075 | 382.32±5.623 |
| Pointed gourd | 353.31±5.678 | 196.71±11.296 | 340.15±9.760 |

**Table S12** Effect of P. pentosaceus HPM1 bacteriocin on vegetables fat percentage during preservation. Data are presented as mean ± standard deviation (n=3). Statistical significance was determined using One-way ANOVA followed by Tukey’s HSD test.

| **Vegetable** | **Fat percentage (%)** | | |
| --- | --- | --- | --- |
| Fresh | Control_treatment | HPM1_ treatment |
| Tomato | 0.39±0.026 | 0.09±0.055 | 0.31±0.020 |
| Cucumber | 0.58±0.015 | 0.22±0.037 | 0.57±0.020 |
| Better gourd | 0.23±0.036 | 0.01±0.028 | 0.18±.0173 |
| Pointed gourd | 0.38±0.020 | 0.04±0.026 | 0.37±0.036 |

**Table S13** Effect of P. pentosaceus HPM1 bacteriocin on fruits weight during preservation. Data are presented as mean ± standard deviation (n=3). Statistical significance was determined using One-way ANOVA followed by Tukey’s HSD test.

| **Fruit** | **Weight (gm)** | | |
| --- | --- | --- | --- |
| Fresh | Control_treatment | HPM1_ treatment |
| Apple | 64.33±2.081 | 36.33±4.725 | 61.67±2.309 |
| Banana | 25.67±1.15 | 17.67±2.516 | 24.33±0.577 |
| Grapes | 17.00±2 | 12.00±1 | 16.50±1.500 |
| Sapodilla | 35.33±0.577 | 29.33±1.15 | 34.66±0.577 |

**Table S14** Effect of P. pentosaceus HPM1 bacteriocin on fruits pH value during preservation. Data are presented as mean ± standard deviation (n=3). Statistical significance was determined using One-way ANOVA followed by Tukey’s HSD test.

| **Fruit** | **pH** | | |
| --- | --- | --- | --- |
| Fresh | Control_treatment | HPM1_ treatment |
| Apple | 4.03±0.057 | 4.6±0.173 | 4.06±0.057 |
| Banana | 4.70±0.173 | 3.33±0.288 | 4.53±0.152 |
| Grapes | 4.13±0.057 | 6.00±0 | 4.16±0.115 |
| Sapodilla | 5.53±0.152 | 6.43±0.115 | 5.85±0.455 |

**Table S15** Effect of P. pentosaceus HPM1 bacteriocin on fruits carbohydrate concentration during preservation. Data are presented as mean ± standard deviation (n=3). Statistical significance was determined using One-way ANOVA followed by Tukey’s HSD test.

| **Fruit** | **Carbohydrate concentration (µg/ml)** | | |
| --- | --- | --- | --- |
| Fresh | Control_treatment | HPM1_ treatment |
| Apple | 281±1.63 | 136.46±7.131 | 277.23±1.633 |
| Banana | 491.66±2.835 | 117.57±2.835 | 489.79±1.639 |
| Grapes | 192.68±1.42 | 60.89±2.835 | 189.47±0.911 |
| Sapodilla | 382.55±1.415 | 182.76±2.83 | 378.79±2.163 |

**Table S16** Effect of P. pentosaceus HPM1 bacteriocin on fruits protein concentration during preservation. Data are presented as mean ± standard deviation (n=3). Statistical significance was determined using One-way ANOVA followed by Tukey’s HSD test.

| **Fruit** | **Protein concentration (µg/ml)** | | |
| --- | --- | --- | --- |
| Fresh | Control_treatment | HPM1_ treatment |
| Apple | 900.96±5.652 | 454.32±11.28 | 884.11 ±5.646 |
| Banana | 891.19±5.646 | 350.01±0.005 | 884.10 ±14.929 |
| Grapes | 904.23±5.646 | 454.34±5.646 | 890.61±5.640 |
| Sapodilla | 874.89±5.646 | 385.87±5.646 | 862.93±4.890 |

**Table S17** Effect of P. pentosaceus HPM1 bacteriocin on fruits fat percentage during preservation. Data are presented as mean ± standard deviation (n=3). Statistical significance was determined using One-way ANOVA followed by Tukey’s HSD test.

| **Fruit** | **Fat percentage (%)** | | |
| --- | --- | --- | --- |
| Fresh | Control_treatment | HPM1_ treatment |
| Apple | 0.91±0.035 | 0.13±0.03 | 0.90±0.040 |
| Banana | 0.48±0.04 | 0.27±0.065 | 0.44±0.020 |
| Grapes | 0.31±0.047 | 0.02±0.046 | 0.22±0.045 |
| Sapodilla | 1.48±0.02 | 0.66±0.017 | 1.45±0.020 |

**Table S18** Effect of P. pentosaceus HPM1 bacteriocin on meat and fish weight during preservation. Data are presented as mean ± standard deviation (n=3). Statistical significance was determined using One-way ANOVA followed by Tukey’s HSD test.

| **Meat and fish** | **Weight (gm)** | | |
| --- | --- | --- | --- |
| Fresh | Control_treatment | HPM2_ treatment |
| Meat | 34±1 | 28.33±1.527 | 34±1 |
| Fish | 34.67±0.577 | 26±1 | 34.00±1 |

**Table S19** Effect of P. pentosaceus HPM1 bacteriocin on meat and fish pH value during preservation. Data are presented as mean ± standard deviation (n=3). Statistical significance was determined using One-way ANOVA followed by Tukey’s HSD test.

| **Meat and fish** | **pH** | | |
| --- | --- | --- | --- |
| Fresh | Control_treatment | HPM2_ treatment |
| Meat | 6.06±0.115 | 7.67±0.152 | 6.06±0.057 |
| Fish | 7.33±0.152 | 8.8±0.2 | 7.43±0.115 |

**Table S20** Effect of P. pentosaceus HPM1 bacteriocin on meat and fish carbohydrate concentration during preservation. Data are presented as mean ± standard deviation (n=3). Statistical significance was determined using One-way ANOVA followed by Tukey’s HSD test.

| **Meat and fish** | **Carbohydrate concentration (µg/ml)** | | |
| --- | --- | --- | --- |
| Fresh | Control_treatment | HPM2_ treatment |
| Meat | 31.61±1.639 | 1.66±0.285 | 29.62±0.167 |
| Fish | 37.75±0.432 | 1.66±0.285 | 36.71±1.277 |

**Table S21** Effect of P. pentosaceus HPM1 bacteriocin on meat and fish protein concentration during preservation. Data are presented as mean ± standard deviation (n=3). Statistical significance was determined using One-way ANOVA followed by Tukey’s HSD test.

| **Meat and fish** | **Protein concentration (µg/ml)** | | |
| --- | --- | --- | --- |
| Fresh | Control_treatment | HPM2_ treatment |
| Meat | 861.85±5.646 | 138.11±5.646 | 857.72±9.791 |
| Fish | 894.45±5.646 | 128.32±5.646 | 889.31±7.046 |

**Table S22** Effect of P. pentosaceus HPM1 bacteriocin on meat and fish fat percentage during preservation. Data are presented as mean ± standard deviation (n=3). Statistical significance was determined using One-way ANOVA followed by Tukey’s HSD test.

| **Meat and fish** | **Fat percentage (%)** | | |
| --- | --- | --- | --- |
| Fresh | Control_treatment | HPM1_ treatment |
| Meat | 6.31±0.191 | 0.01±0.023 | 5.97±0.241 |
| Fish | 4.26±0.051 | 0±0 | 4.25±0.080 |

**Table S23** Cell cytotoxicity profile of P. pentosaceus HPM1-derived bacteriocin by MTT assay. Data are presented as mean ± standard deviation (n=3). Statistical significance was determined using One-way ANOVA followed by Tukey’s HSD test.

| Blank | 10 μg/ml | 20 μg/ml | 30 μg/ml | 40 μg/ml | 50 μg/ml | 60 μg/ml | 70 μg/ml | 80 μg/ml | 100 μg/ml | H2O2 (1μM) |
| --- | --- | --- | --- | --- | --- | --- | --- | --- | --- | --- |
| 100±0 | 126.29±1.69 | 125.92±2.56 | 124.44±2.22 | 124.81±4.62 | 125.55±1.11 | 132.96±1.69 | 135.18±0.64 | 139.62±3.57 | 141.11±5.09 | 19.89±1.65 |


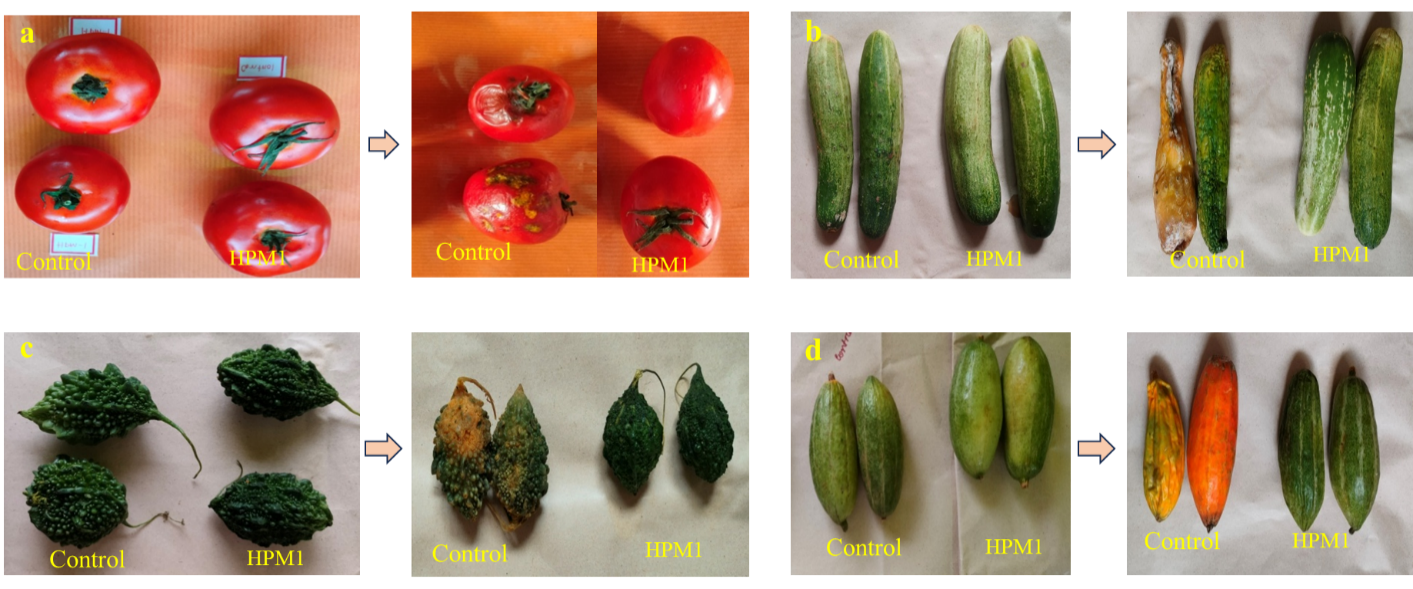


**Fig. S1** Vegetables preservation with P. pentosaceus HMP1 bacteriocin in room temperature. (a) Tomato preservation, (b) Cucumber preservation, (c) Bitter gourd preservation, (d) Pointed gourd preservation.


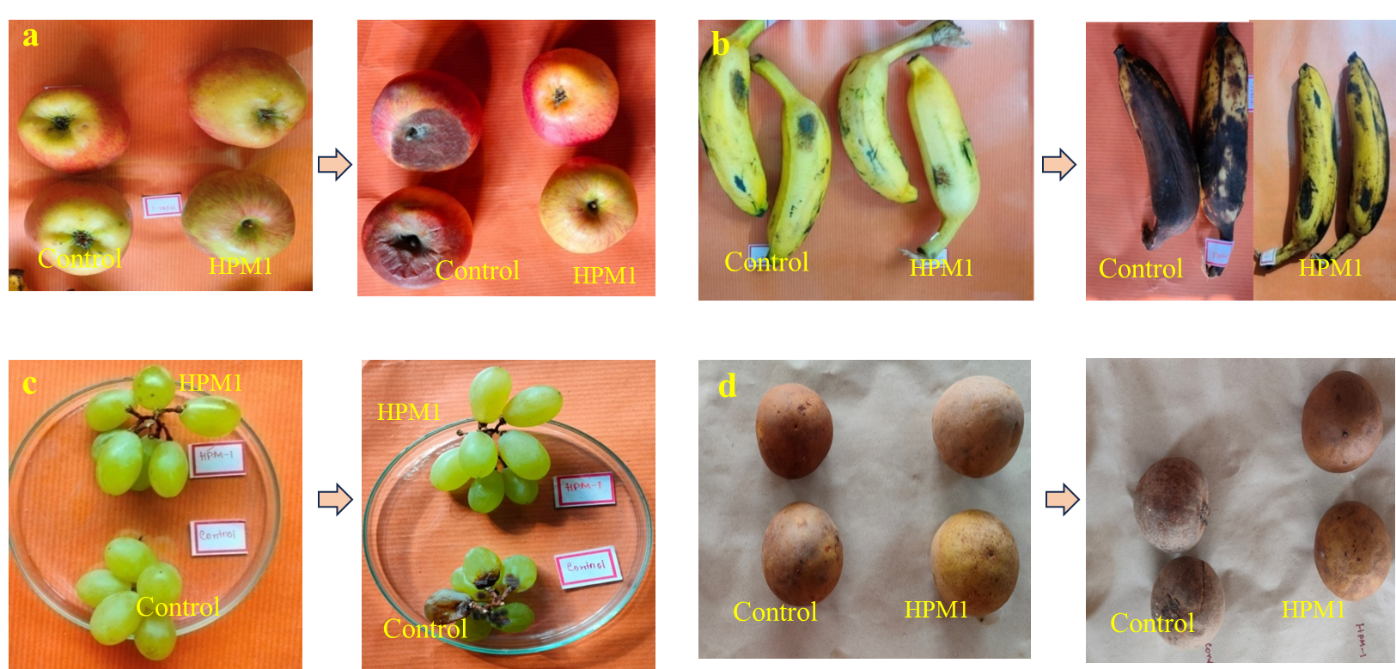


**Fig. S2** Fruits preservation with P. pentosaceus HMP1 bacteriocin in room temperature. (a) Apple preservation, (b) Banana preservation, (c) Grapes preservation, (d) Sapodilla preservation.


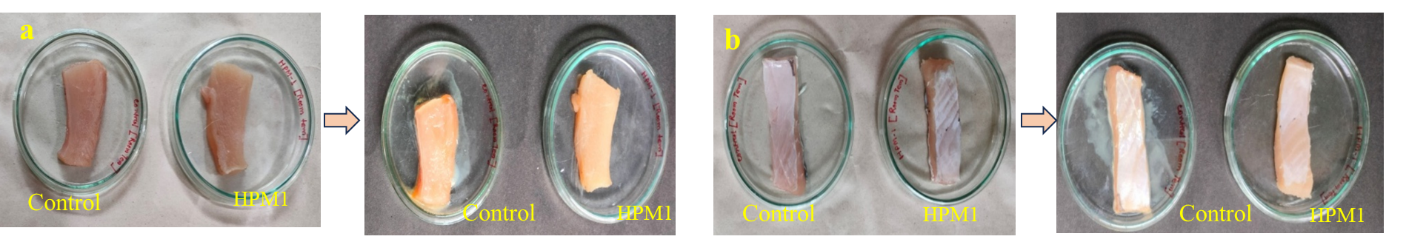


**Fig. S3** Meat and fish preservation with P. pentosaceus HMP1 bacteriocin in room temperature. (a) Meat preservation, (b) Fish preservation.


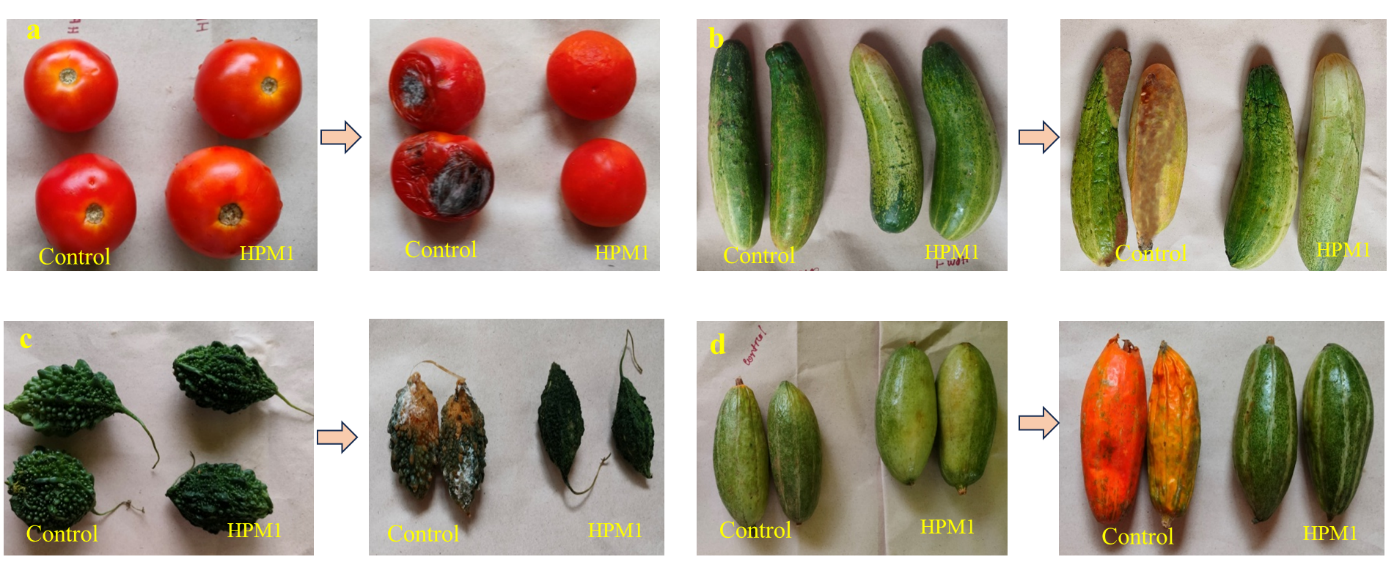


**Fig. S4** Vegetables preservation with P. pentosaceus HMP1 bacteriocin in freezing temperature. (a) Tomato preservation, (b) Cucumber preservation, (c) Bitter gourd preservation, (d) Pointed gourd preservation.


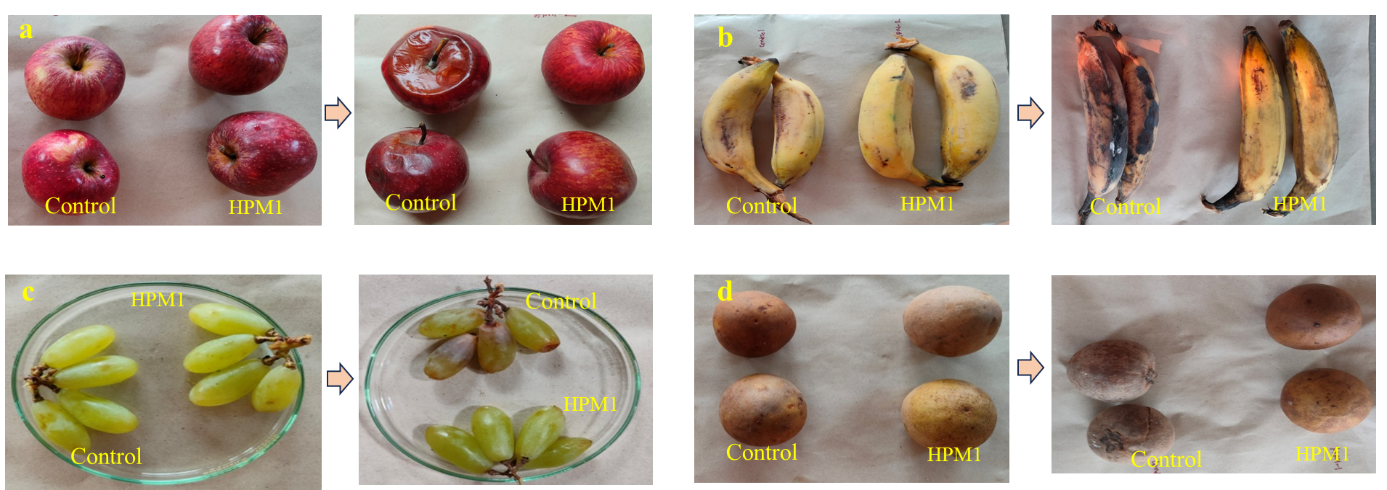


**Fig. S5** Fruits preservation with P. pentosaceus HMP1 bacteriocin in freezing temperature. (a) Apple preservation, (b) Banana preservation, (c) Grapes preservation, (d) Sapodilla preservation.


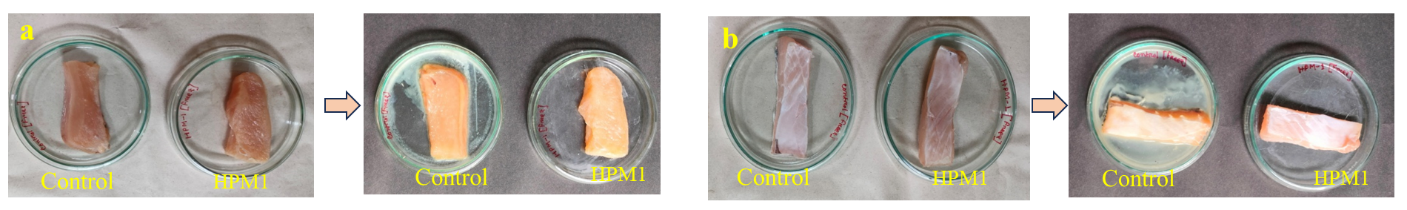


**Fig. S6** Meat and fish preservation with P. pentosaceus HMP1 bacteriocin in freezing temperature. (a) Meat preservation, (b) Fish preservation.
